# Supplementary material for: Anti-Inflammatory, Antinociceptive, Antipyretic, and Gastroprotective Effects of Eurycoma longifolia Jack Ethanolic Extract
Source: MDPI journal article supplement (doi:10.3390/life13071465), 2023-06-28
Supplement: s1 [file s1]

## Supplementary Materials

# Anti-Inflammatory, Antinociceptive, Antipyretic, and Gastroprotective Effects of *Eurycoma longifolia* Jack Ethanolic Extract

**Supplementary Table S1.** Effects of ELJ extract and phenylbutazone on EPP-induced ear edema in rats.

| Group          | Dose (mg/ear) | Edema thickness (μm) |           |           |           | Edema inhibition (%) |        |        |         |
|----------------|---------------|----------------------|-----------|-----------|-----------|----------------------|--------|--------|---------|
|                |               | 15 min               | 30 min    | 60 min    | 120 min   | 15 min               | 30 min | 60 min | 120 min |
| Control        | -             | 110 ± 9              | 232 ± 23  | 338 ± 27  | 230 ± 15  | -                    | -      | -      | -       |
| Phenylbutazone | 1             | 42 ± 10*             | 93 ± 10*  | 178 ± 14* | 132 ± 10* | 62                   | 60     | 47     | 43      |
| ELJ extract    | 1             | 45 ± 9*              | 123 ± 27* | 153 ± 39* | 125 ± 38* | 59                   | 47     | 55     | 46      |
|                | 2             | 37 ± 7*              | 93 ± 17*  | 137 ± 26* | 123 ± 30* | 67                   | 60     | 60     | 46      |
|                | 4             | 27 ± 7*              | 78 ± 7*   | 120 ± 33* | 95 ± 20*  | 76                   | 66     | 64     | 59      |

Values are expressed as mean ± SEM ( $n = 6$ ). Control: treated with acetone. \* Significantly different from its control group,  $p > 0.05$ .

**Supplementary Table S2.** Effects of ELJ extracts and aspirin on carrageenan-induced hind paw edema in rats.

| Groups      | Dose (mg/kg) | Time after 1% carrageenin injection |              |                   |              |                   |              |
|-------------|--------------|-------------------------------------|--------------|-------------------|--------------|-------------------|--------------|
|             |              | 1 hour                              |              | 3 hours           |              | 5 hours           |              |
|             |              | Edema volume (ml)                   | % Inhibition | Edema volume (ml) | % Inhibition | Edema volume (ml) | % Inhibition |
| Control     | -            | 0.41 ± 0.07                         | -            | 1.28 ± 0.11       | -            | 1.18 ± 0.04       | -            |
| Aspirin     | 300          | 0.17 ± 0.06*                        | 58           | 0.64 ± 0.12*      | 50           | 0.61 ± 0.10*      | 48           |
| ELJ extract | 300          | 0.35 ± 0.14                         | 15           | 1.25 ± 0.09       | 2            | 1.01 ± 0.17       | 9            |
|             | 600          | 0.26 ± 0.06                         | 36           | 1.13 ± 0.06       | 12           | 1.00 ± 0.06       | 15           |
|             | 1200         | 0.14 ± 0.05*                        | 66           | 0.87 ± 0.11*      | 32           | 0.88 ± 0.09*      | 25           |

Values are expressed as mean ± SEM ( $n = 6$ ). Control: treated with acetone. \* Significantly different from its control group,  $p > 0.05$ .

**Supplementary Table S3.** Effects of ELJ extract, control, and cimetidine in a rat model of EtOH/HCl acid-induced gastric lesions.

| Group       | Dose (mg/kg) | Ulcer Index <sup>1</sup> | % inhibition |
|-------------|--------------|--------------------------|--------------|
| Control     | -            | 81.52 ± 7.12             | -            |
| Cimetidine  | 100          | 20.02 ± 3.48*            | 75           |
| ELJ extract | 150          | 36.92 ± 5.27*,#          | 55           |
| ELJ extract | 300          | 32.38 ± 6.92*,#          | 60           |
| ELJ extract | 600          | 30.50 ± 2.36*,#          | 62           |

<sup>1</sup> Ulcer indexes are mean ± S.E.M. ( $N=6$ ). \* Significantly different from the control group,  $p < 0.05$  and # Significant different from the cimetidine group,  $p < 0.05$ .

**Supplementary Table S4.** Effect of ELJ and cimetidine on indomethacin-induced gastric ulcer in rat.

| Group       | Dose (mg/kg) | Ulcer Index <sup>1</sup> | % inhibition |
|-------------|--------------|--------------------------|--------------|
| Control     | -            | 9.30 ± 0.59              | -            |
| Cimetidine  | 100          | 0.40 ± 0.27*             | 95           |
| ELJ extract | 150          | 7.20 ± 1.16*,#           | 23           |
| ELJ extract | 300          | 1.12 ± 0.31*             | 88           |
| ELJ extract | 600          | 0.65 ± 0.36*             | 93           |

<sup>1</sup> Ulcer indexes are mean ± S.E.M. ( $n=6$ ). \* Significantly different from the control group,  $p < 0.05$  and # Significant different from the cimetidine group,  $p < 0.05$ .

**Supplementary Table S5.** Effects of ELJ extract, control, and cimetidine in a rat model of the restraint water immersion stress-induced gastric lesions.

| Group       | Dose (mg/kg) | Ulcer Index <sup>1</sup>  | % inhibition |
|-------------|--------------|---------------------------|--------------|
| Control     | -            | 10.42 ± 2.36              | -            |
| Cimetidine  | 100          | 0.80 ± 0.28*              | 92           |
| ELJ extract | 150          | 5.08 ± 0.96* <sup>#</sup> | 51           |
| ELJ extract | 300          | 1.95 ± 0.44*              | 81           |
| ELJ extract | 600          | 1.82 ± 0.41*              | 82           |

<sup>1</sup> Ulcer indexes are mean ± S.E.M. (n=6). \* Significantly different from the control group,  $p < 0.05$  and  
<sup>#</sup> Significant different from the cimetidine group,  $p < 0.05$ .
